# Supplementary material for: Social network analysis of psychological morbidity in an urban slum of Bangladesh: a cross-sectional study based on a community census
Source: PubMed Central journal article supplement — BMJ Open. 2018 Jul 16;8(7):e020180. doi: 10.1136/bmjopen-2017-020180 (PMC6082466; doi:10.1136/bmjopen-2017-020180), 2018-07-16
Supplement: bmjopen-2017-020180supp001.pdf [file bmjopen-2017-020180supp001.pdf]

1 **A social network analysis of psychological morbidity in an urban slum of Bangladesh: a**  
2 **cross-sectional study based on a community census**

3 **APPENDIX A: DETAILED ITEM ANALYSES OF GHQ-12**

4 Here we present the detailed item-wise report from the Generalized Health Questionnaire we  
5 have implemented among our respondents (see Appendix Table 1). We have used a version of  
6 the GHQ-12 that has been previously translated and adopted in Bangladeshi context (Hossain,  
7 Siddique and Habib 2017, Islam and Iqbal 2008).

8 **Appendix Table 1: GHQ-12 Responses by Each Item**

|                                                                         | Reponses (fraction of total) |           |       |        | Mean         | 95% CI       |              |
|-------------------------------------------------------------------------|------------------------------|-----------|-------|--------|--------------|--------------|--------------|
|                                                                         | Never                        | Sometimes | Often | Always |              |              |              |
|                                                                         | 0                            | 1         | 2     | 3      |              |              |              |
| Have you recently been able to; concentrate on what you are doing?      | 0.347                        | 0.489     | 0.157 | 0.007  | 0.824        | 0.776        | 0.872        |
| Have you recently lost much sleep over worry?                           | 0.417                        | 0.485     | 0.085 | 0.012  | 0.692        | 0.646        | 0.738        |
| Have you recently felt you were playing important part in things?       | 0.369                        | 0.468     | 0.159 | 0.004  | 0.797        | 0.749        | 0.846        |
| Have you recently felt capable of making decisions about things?        | 0.214                        | 0.567     | 0.211 | 0.008  | 1.015        | 0.968        | 1.061        |
| Have you recently felt consistently under strain?                       | 0.280                        | 0.511     | 0.184 | 0.024  | 0.953        | 0.901        | 1.004        |
| Have you recently felt you couldn't overcome your difficulties?         | 0.227                        | 0.552     | 0.205 | 0.016  | 1.010        | 0.962        | 1.058        |
| Have you recently been able to enjoy your normal day to day activity?   | 0.291                        | 0.522     | 0.180 | 0.007  | 0.903        | 0.855        | 0.951        |
| Have you recently been able to face up to your problems?                | 0.209                        | 0.542     | 0.242 | 0.007  | 1.047        | 1.000        | 1.095        |
| Have you recently been unhappy and depressed?                           | 0.471                        | 0.453     | 0.069 | 0.007  | 0.613        | 0.569        | 0.657        |
| Have you recently been losing confidence in yourself?                   | 0.715                        | 0.221     | 0.028 | 0.036  | 0.386        | 0.337        | 0.435        |
| Have you recently been thinking of yourself as a worthless person?      | 0.733                        | 0.237     | 0.017 | 0.013  | 0.311        | 0.271        | 0.350        |
| Have you recently been feeling reasonably happy, all things considered? | 0.451                        | 0.437     | 0.097 | 0.015  | 0.675        | 0.626        | 0.723        |
| <b>Overall GHQ-12</b>                                                   |                              |           |       |        | <b>9.225</b> | <b>8.893</b> | <b>9.556</b> |

9

1        There are two suggested methods of scoring for GHQ-12. We have used the ‘four point  
2 response scale’ or Likert method, which should allow more variation in the scores (see Hankins  
3 2008). GHQ-12 typically captures the unidimensional nature of unspecified psychological  
4 morbidity and commonly used in survey based instruments to measure the mental wellbeing in  
5 different populations.

## 6 **APPENDIX B: CENTRALITY MEASURES**

7        While intuitive, just focusing on the number of friendship ties can mask the deeper structure  
8 of social power or popularity within a network. We focus on a number of more sophisticated  
9 measures of centrality which gauge one’s position in the entire network by analyzing not just the  
10 number of people they are connected to but also the type of people they are connected to and  
11 reveals to what extent that person is central/peripheral in his social network by analyzing their  
12 network positions (Freeman 1978). While ‘node degree’ shows the extent of connectedness,  
13 centrality shows how well and centrally each node is connected and we focus on a number of  
14 them.

### 15 *Degree Centrality*

16        Degree centrality is simply the number of degrees each person has. In-degree centrality is the  
17 number of referrals each person gets, out-degree centrality is the number of referrals each person  
18 gives and all-degree centrality is the number of total referrals (summing both the referrals he  
19 gives and the ones he gets). Hence, degree centrality is just the number of friendship ties each  
20 respondent has normalized by the possible total number of ties ( $N - 1$ ).

### 21 *Closeness Centrality*

22        Closeness centrality is the inverse of the average distance within a network. It measures how  
23 distant a node is from the rest of the nodes and how many times it has to be crossed by other

1 nodes to reach some other node using the shortest path. Applying this in the context of our  
2 friendship network, we can measure how many stages a person requires to get connected to  
3 another random person or node in the network.

$$\text{Closeness Centrality}_i = \frac{n - 1}{\sum_{j \neq i} l(i, j)}$$

4 where,  $l(i, j)$  denotes the number of links node  $i$  needs to reach to node  $j$  using the shortest path.  
5 Input closeness centrality and output closeness centrality take into account of the direction of  
6 referral while all closeness centrality does not.

### 7 *Betweenness Centrality*

8 Betweenness centrality is a measure of centrality based on how well situated a person is in  
9 terms of the paths he lies on (see Freeman 1978, Jackson 2010). This takes into account the  
10 number of shortest links connecting each node to all other nodes that pass through a particular  
11 node.

12 Let  $P_i(j, k)$  denote the number of shortest paths between any two nodes  $j$  and  $k$  that pass  
13 through node  $i$  and, let  $P(j, k)$  represent the number of shortest paths between these two nodes .  
14 Then,

$$\text{Betweenness Centrality}_i = \sum_{k \neq j, k, j} \frac{P_i(k, j)/P(k, j)}{(n - 1)(n - 2)/2}$$

15 where,  $n$  is total number of nodes. So in short, betweenness centrality of a node is equal to the  
16 number of geodesics passed through that particular node divided by the number of all the  
17 geodesics of any two other nodes.

## 1 *Eigenvector Centrality*

2 Eigenvector centrality measures a person's centrality based on the centrality of his direct  
3 connections. Letting  $C^e(g)$  denote the eigenvector centrality associated with a network  $g$ , then  
4 the centrality of a node is proportional to the sum of the centrality of its neighbors. So,  
5 eigenvector centrality,  $\tau C_j^e(g) = \sum_i g_{ij} C_i^e(g)$ . And in terms of matrix,  $\tau C^e(g) = g C^e(g)$  where  
6  $C^e(g)$  is an eigenvector of  $g$  and  $\tau$  is the corresponding eigenvalue.

7 Eigenvector centrality is a better measure of social prestige as it takes account of the position  
8 of the direct friends of each person (Bonacich, 2007). As a result, a person having very few but  
9 centrally positioned friends will not be under-estimated to a person having a lot of almost  
10 isolated or peripherally positioned friends. Eigenvector centrality is closely related to Bonacich  
11 centrality and is a variant of Bonacich centrality. They are also used as a proxy for each other  
12 (Bonacich, 1987, Bonacich, 1991).

## 13 **APPENDIX C: ROBUSTNESS CHECKS**

14 To test the validity of our statistical findings, we carry out some additional robustness checks  
15 to see whether our estimates are sensitive to the models we have determined. The results are  
16 presented in Appendix Table 2. We first restrict our models by dropping the 267 isolated  
17 respondents. It is possible that our centrality measures can pick up the outcome differences  
18 between these two groups. However, results in row (1) of Appendix Table 2 suggest this is not  
19 the case. The estimate on the sub-sample is -0.098 (95% CI -0.151 to -0.044), which is very  
20 similar to the value we found in column (4) in Table 3. The estimated coefficient on betweenness  
21 centrality is not sensitive to excluding the isolated nodes. We also find that betweenness  
22 centrality has too many zeros, hence, we define a dummy for respondents with non zero values  
23 and re-estimate the model. We find negative association between mental health outcomes of the

1 respondents and those with non-zero betweenness centrality (-0.163, 95% CI -0.321 to -0.004,  
 2 see row [2]). The results are very similar for eigenvector centrality as well (see rows [3] and [4]  
 3 in Appendix Table 1). We also use a new measure of being influential within a network namely  
 4 input proximity prestige index. We find that one SD higher value in this index is associated with  
 5 0.06 SD lower GHQ score (95% CI -0.124 to 0.010, see row [5]), suggesting better mental health  
 6 outcomes.

7 **Appendix Table 2: Robustness Checks**

|                                    |                                                                      | Coefficient | (95% CI)           | N   | R <sup>2</sup> |
|------------------------------------|----------------------------------------------------------------------|-------------|--------------------|-----|----------------|
| (1)                                | Betweenness Centrality (standardized) excluding isolated respondents | -0.098***   | (-0.151 to -0.044) | 557 | 0.058          |
| (2)                                | = 1 if Betweenness Centrality > 0                                    | -0.163**    | (-0.321 to -0.004) | 824 | 0.038          |
| (3)                                | Eigenvector Centrality (standardized) excluding isolated respondents | -0.060***   | (-0.098 to -0.023) | 557 | 0.051          |
| (4)                                | = 1 if Eigenvector Centrality > 0                                    | -0.117      | (-0.257 to 0.023)  | 824 | 0.037          |
| (5)                                | Input Proximity Prestige (standardized)                              | -0.057*     | (-0.124 to 0.010)  | 824 | 0.036          |
| Results from ordered probit models |                                                                      |             |                    |     |                |
| (6)                                | All closeness centrality (standardized)                              | -0.052      | (-0.124 to 0.019)  | 824 |                |
| (7)                                | Betweenness centrality (standardized)                                | -0.106***   | (-0.177 to -0.034) | 824 |                |
| (8)                                | Eigenvalue centrality (standardized)                                 | -0.064*     | (-0.133 to 0.006)  | 824 |                |

8 Note: The outcome variable is the standardized GHQ score in all specifications. In specifications (1) and (3), we  
 9 drop the respondents who do not have any friendship tie. In specifications (2) and (4), we use an indicator variable  
 10 for respondents with non-zero centrality values. In specifications (6-8), we use ordered probit models for the discrete  
 11 standardized GHQ score as the outcome variables. In all specifications, we have retained the control variables that  
 12 we include in Table 3. The robust p-values are reported in parentheses. \*\*\* p<0.01, \*\* p<0.05, \* p<0.1.

13 As we noted earlier, GHQ scores are essentially discrete in nature and we could actually  
 14 reject null hypothesis of normality distribution in GHQ scores. So we have re-estimated the  
 15 models with three centrality scores using ordered probit models and relaxed the normality  
 16 assumption in the outcome variables. The results are presented in rows (6-8). We find that both

1 the point estimates and also the second moments are generally not sensitive to the alternative  
2 regression models.

3 **Appendix Figure 1: Testing for Outliers in Residuals and QQ Plots**

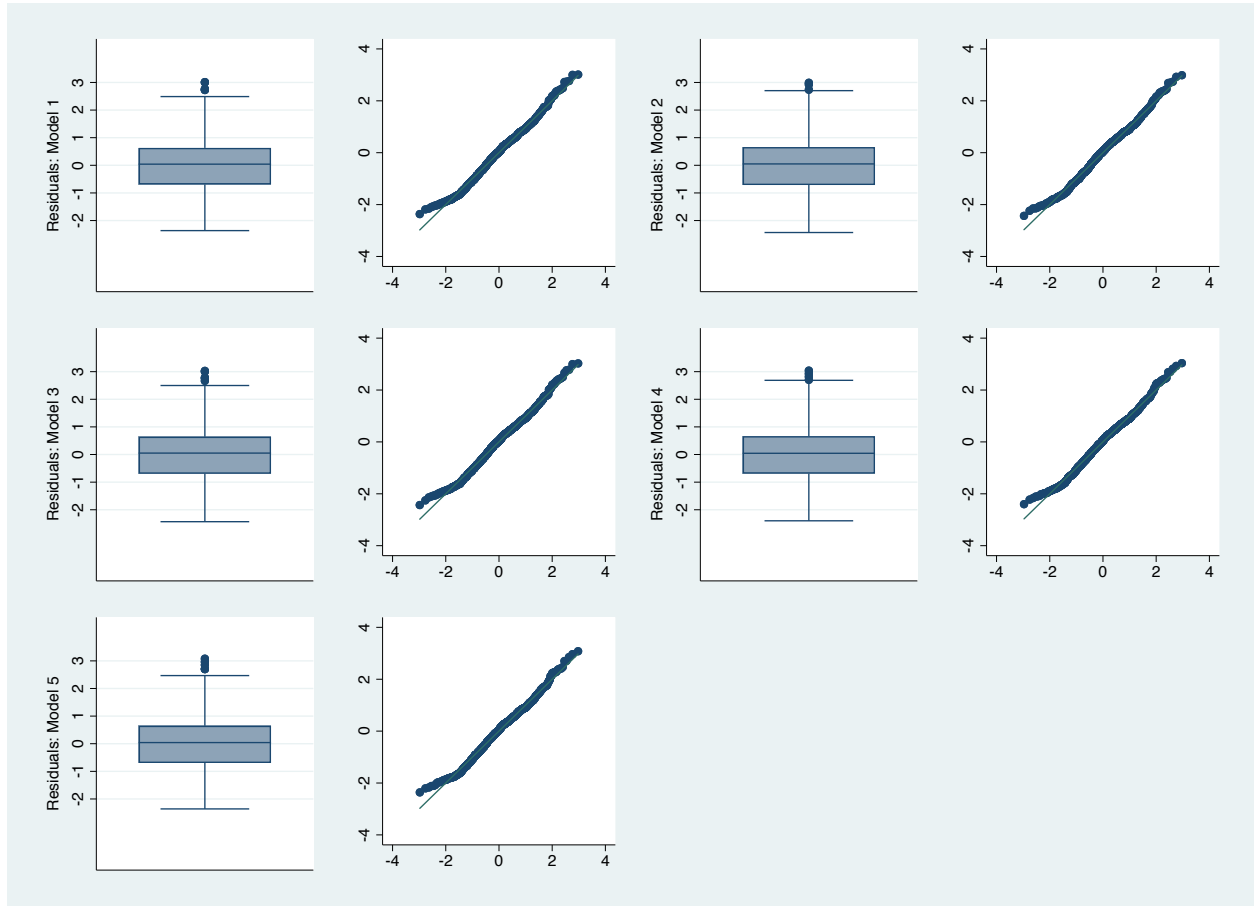

4 Note: In each panel, on the left we plot the box-plot for the residuals from each model reported in Table 3.  
5 On the right, we show the QQ plots for the same residuals.

6 **APPENDIX D: DIAGNOSTIC TESTS FOR REGRESSION RESULTS IN TABLE 3**

7 We present some diagnostic tests for the basic Gauss-Markov assumptions here (see  
8 Wooldridge 2002). Our outcome variable is discrete in nature so it is important test for  
9 normality. We also check for outliers in our models. We box plot the residuals for all five models  
10 from Table 3 and also plot the QQ chart to visually inspect the distributions for the residuals  
11 from the same models. We present the charts in different panels in Appendix Figure 1.

1 Simple visual inspections suggest there are few outliers in the residuals from all five models;  
 2 however, the frequency does not warrant much concern. We also look at the quintile normal  
 3 figures and residuals generally lie on the lines. While they may suggest that misspecifications  
 4 may not be an issue we further use statistical tests to check the normality of the residuals. We  
 5 show the results in Appendix Table 2.

6 **Appendix Table 2: Normality Tests**

| Model | p-value      |                  |
|-------|--------------|------------------|
|       | Shapiro-Wilk | Shapiro –Francia |
| 1     | 0.00041      | 0.00121          |
| 2     | 0.00077      | 0.00213          |
| 3     | 0.00059      | 0.00163          |
| 4     | 0.00062      | 0.00172          |
| 5     | 0.00042      | 0.00119          |

7 Note. We report the p-values from Shapiro-Wilk and Shapiro-Francia tests  
 8 for residuals from each model reported in Table 3.

9 The normality tests reported in Appendix Table 2 suggest that in all five models null of  
 10 hypotheses of normality are rejected. Hence, we carry out further robustness checks with  
 11 alternate specifications as reported in Appendix D below.

12 **BIBLIOGRAPHY**

13 Bonacich, Phillip. "Power and Centrality: A Family of Measures." *American Journal of*  
 14 *Sociology*, 1987: 1170-1182.

15 Bonacich, Phillip. "Simultaneous group and individual centralities." *Social networks* 13, no.  
 16 2 (1991): 155-168.

17 Bonacich, Phillip. "Some unique properties of eigenvector centrality." *Social networks* 29,  
 18 no. 4 (2007): 555-564.

1 Freeman, Linton C. "Centrality in social networks conceptual clarification." *Social Networks*  
2 1, no. 3 (1978): 215-239.

3 Hossain, Md. Mobarak, Nur-E-Alam Siddique, and Murshida Ferdous Binte Habib. "Status  
4 of Marital Adjustment, Life Satisfaction and Mental Health of Tribal (Santal) and Non-Tribal  
5 Peoples in Bangladesh: A Comparative Study." *IOSR Journal Of Humanities And Social Science*  
6 (*IOSR-JHSS*) 22, no. 4 (2017): 5-12.

7 Islam, Md. Nurul, and Kazi Ferdous Iqbal. "Mental Health and Social Support." *The*  
8 *Chittagong Univ. J. B. Sci* 3, no. 1&2 (2008): 95-107.

9 Wooldridge, Jeffrey M. *Econometric analysis of cross section and panel data*. Cambridge,  
10 MA: The MIT Press, 2002.

11
